# Supplementary material for: A genome-wide survey of mutations in the Jurkat cell line
Source: PubMed Central journal article supplement (PMC5941560; doi:10.1186/s12864-018-4718-6), 2018-05-08
Supplement: 12864_2018_4718_MOESM1_ESM.pdf [file 12864_2018_4718_MOESM1_ESM.pdf]

# Supplementary Materials for

## **A Genome-wide Survey of Mutations in the Jurkat Cell Line**

Louis Gioia\*, Azeem Siddique, Steven R. Head, Daniel R. Salomon, & Andrew I. Su

\*To whom correspondence should be addressed; E-mail: lhgioia@scripps.edu

### **This PDF file includes:**

Figs. S1 to S8

Captions for Tables S1 and S2

**Figure S1: Raw CNVnator read depth density**  
Distribution of raw CNVnator read depth calls.

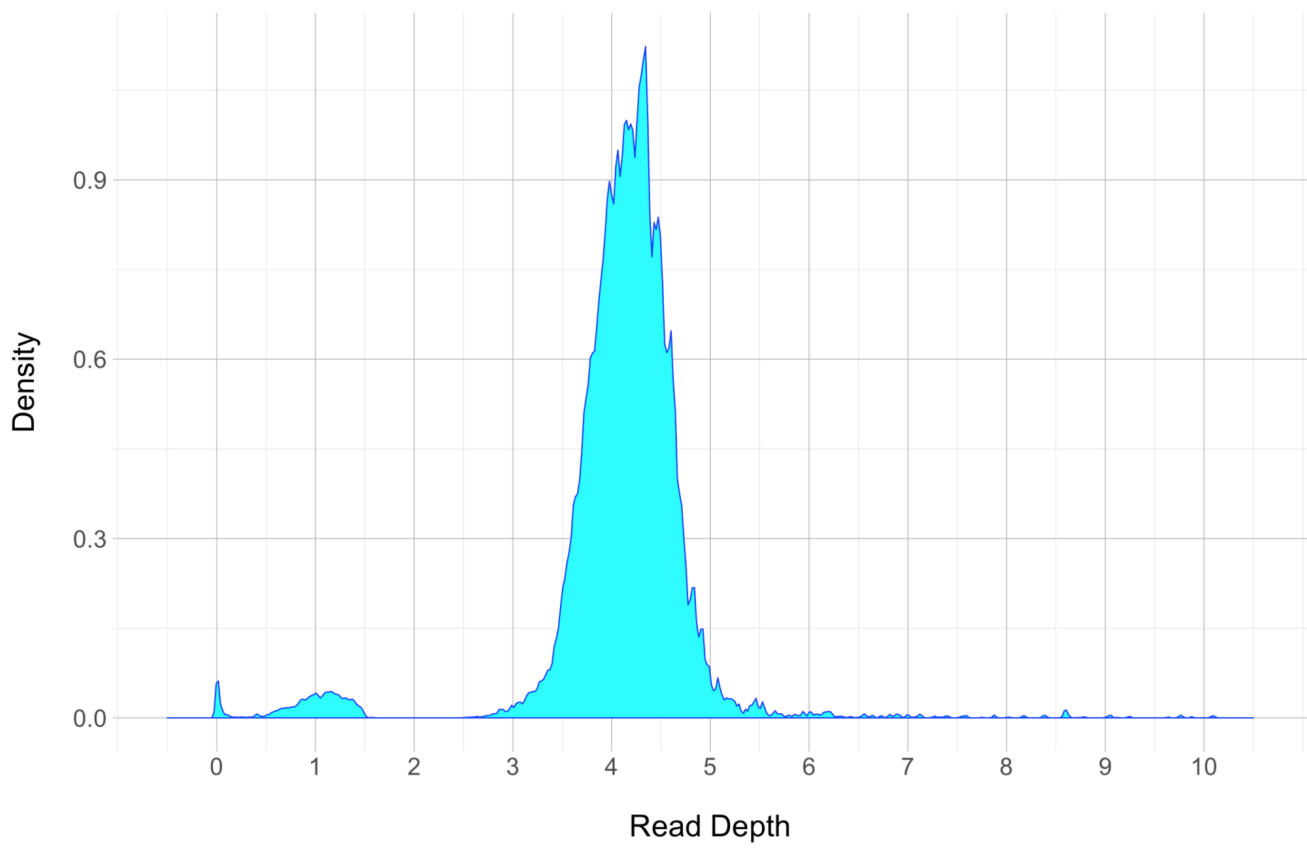

**Figure S2: Deletion size distributions by variant caller (1 – 200bp)**

Distributions of deletion call sizes between 1bp and 200bp for each variant caller. The bin size is 1bp.

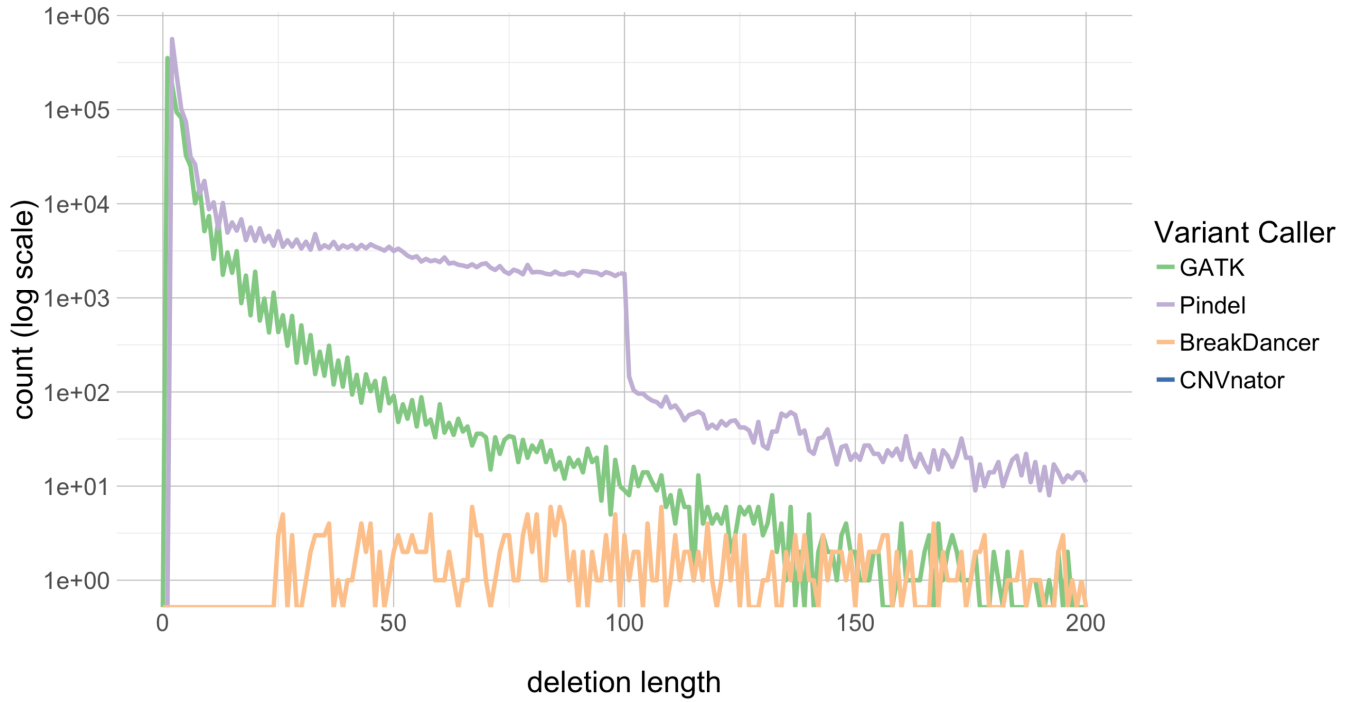

**Figure S3: Deletion size distributions by variant caller (200 – 1,000bp)**

Distributions of deletion call sizes between 200bp and 1kb for each variant caller. The bin size is 10bp.

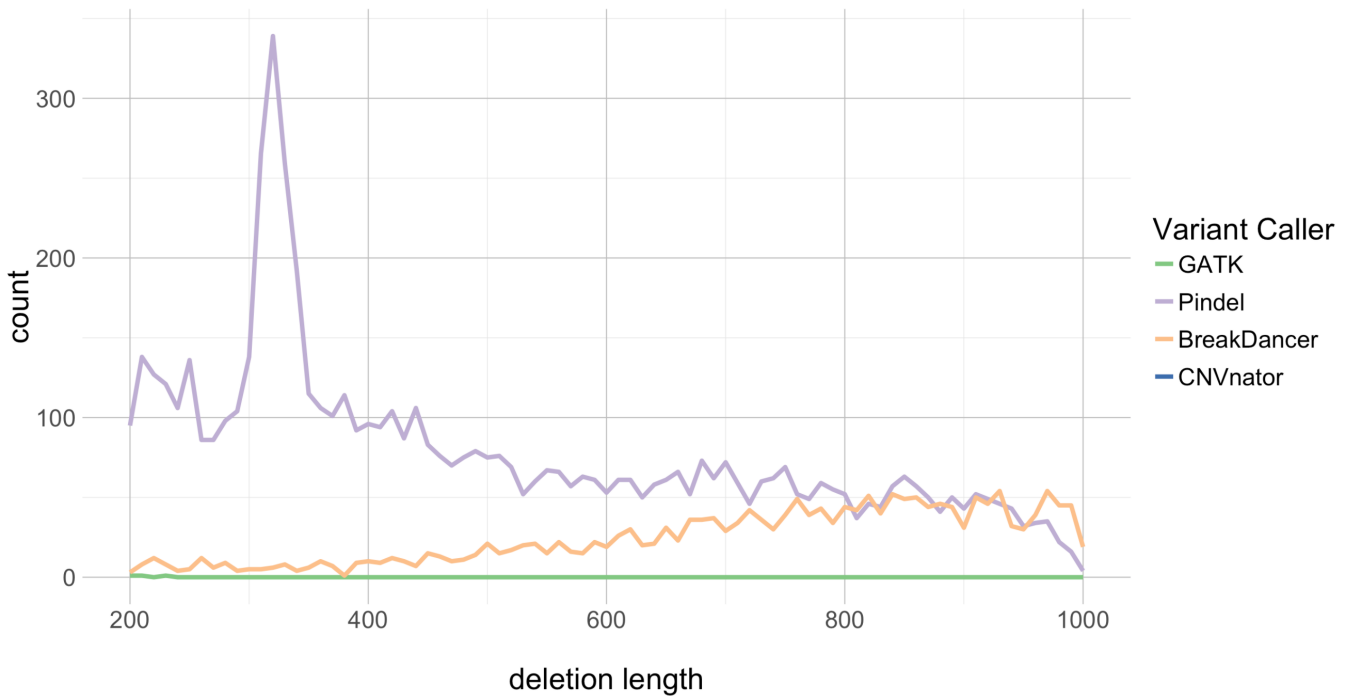

**Figure S4: Deletion size distributions by variant caller (1,000 – 100,000,000bp)**

Distributions of deletion call sizes between 1kb and 100Mb for each variant caller. The bin size is log-scaled with 200 bins.

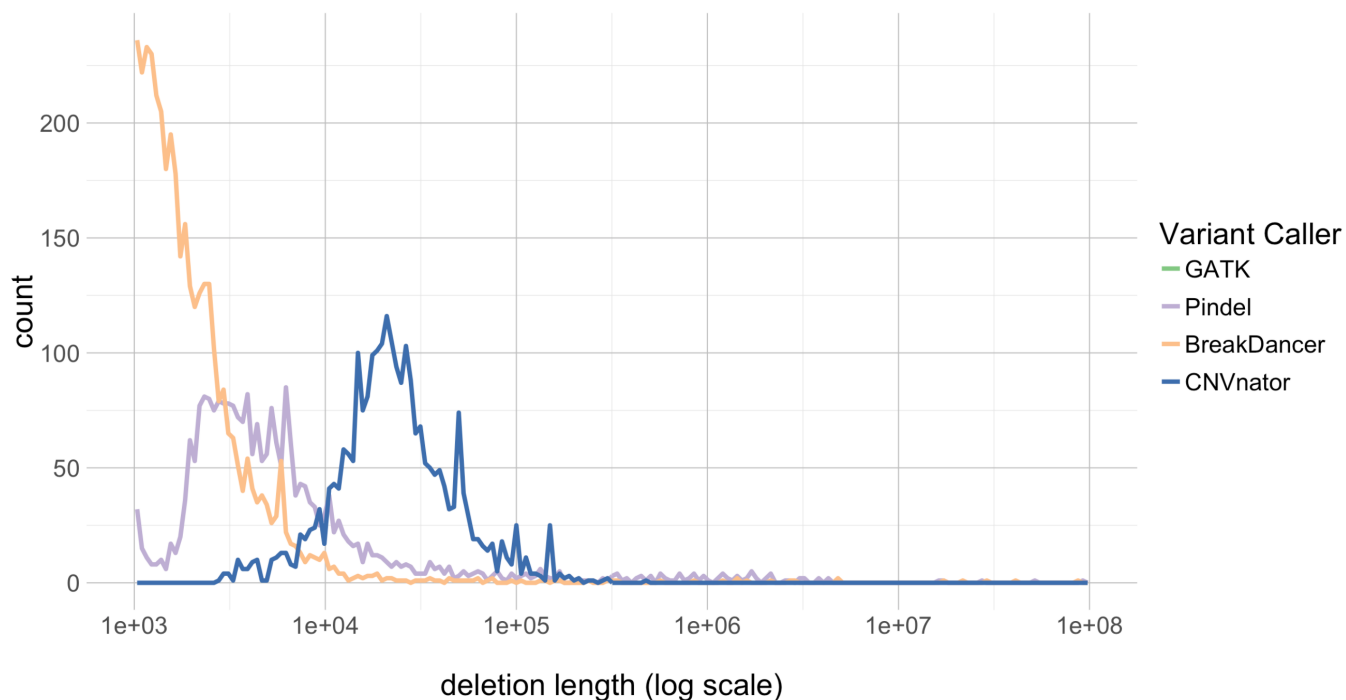

**Figure S5: Insertion size distributions by variant caller**

Distributions of insertion call sizes for each variant caller. The bin size is 1bp.

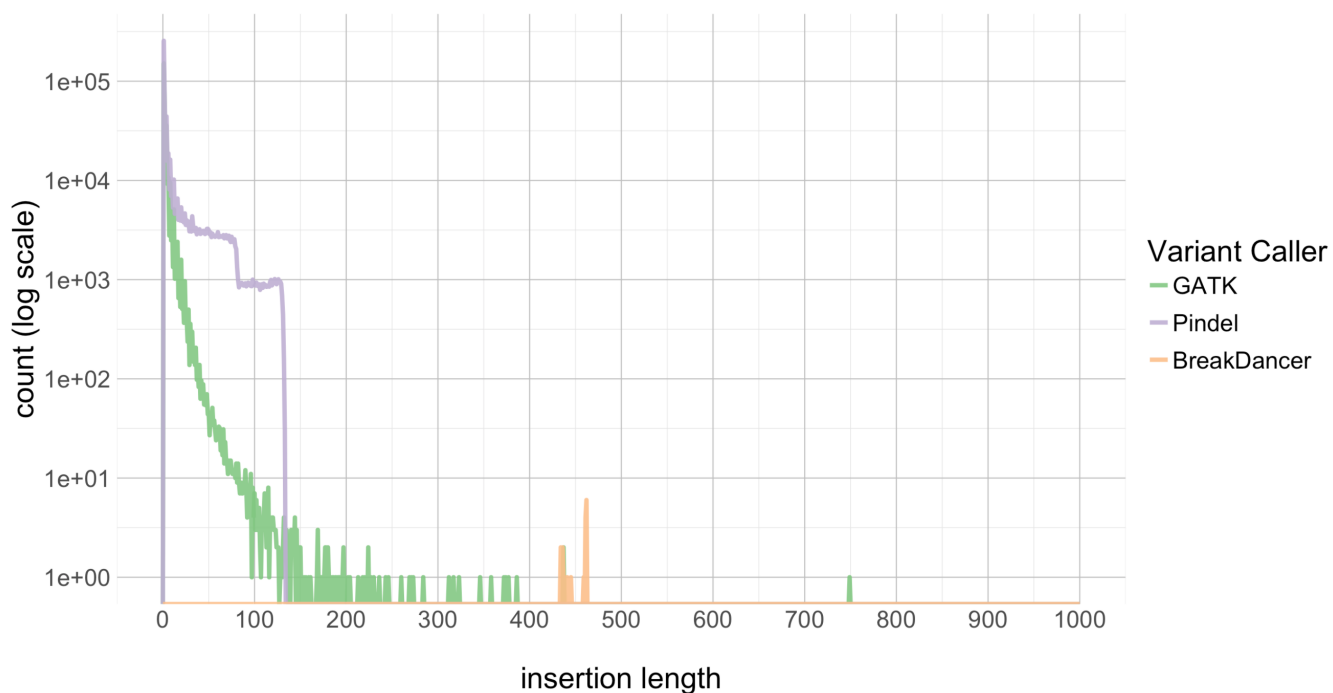

**Figure S6: Duplication size distributions by variant caller**

Distributions of duplication call sizes for each variant caller. The bin size is log-scaled with 200 bins.

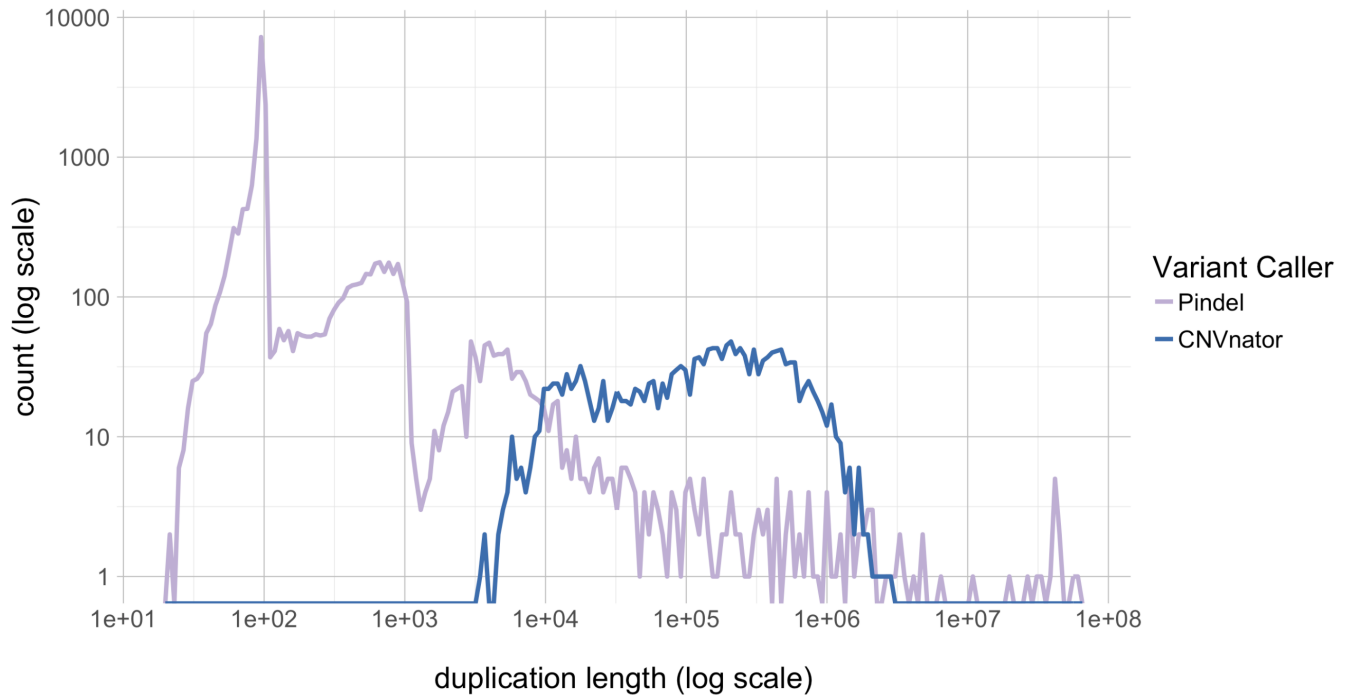

**Figure S7: Inversion size distributions by variant caller**

Distributions of inversion call sizes for each variant caller. The bin size is log-scaled with 100 bins.

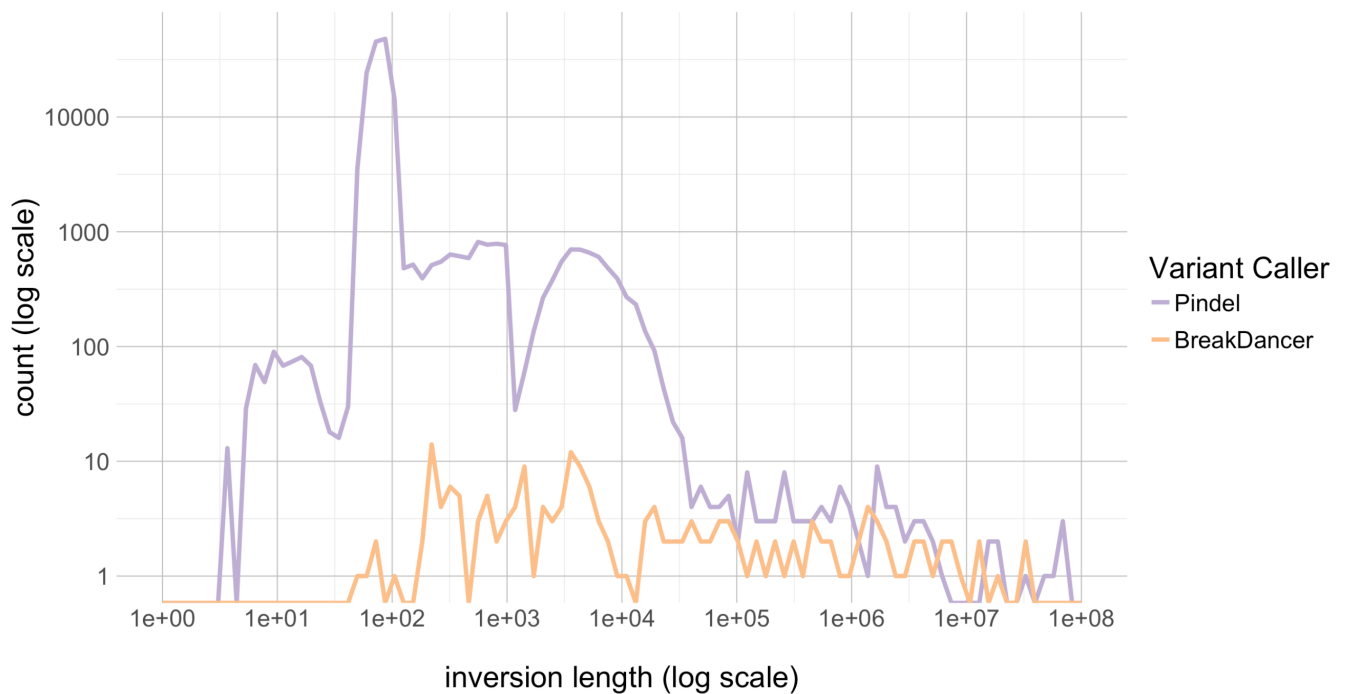

**Figure S8: Intra-chromosomal translocation size distributions by variant caller**

Distributions of intra-chromosomal translocation call sizes for each variant caller. The bin size is log-scaled with 100 bins.

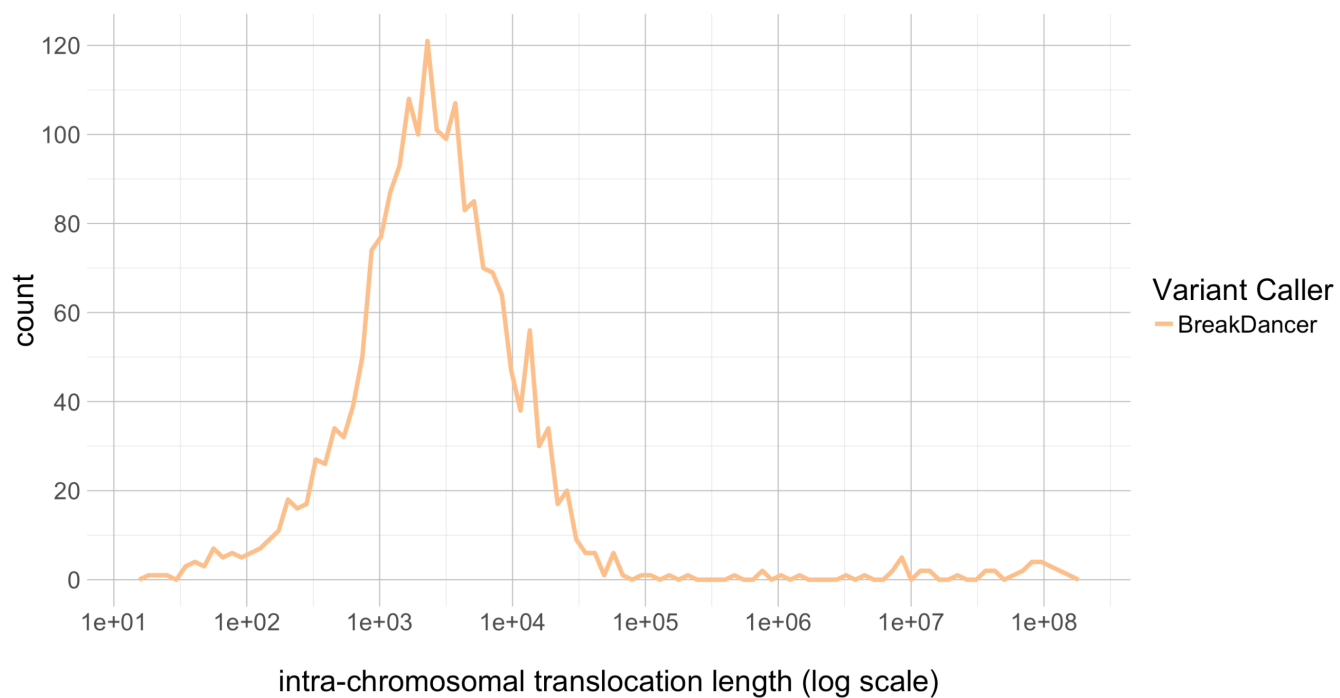

**Table S1: Long deletions found in Jurkat with matches to pathogenic variants in dbVar**

Matches were determined by 90% reciprocal overlap. All database matches are included with one dbVar entry per row.

**Table S2: Duplications found in Jurkat with matches to pathogenic variants in dbVar**

Matches were determined by 90% reciprocal overlap. All database matches are included with one dbVar entry per row.
